# Supplementary material for: Folate decorated delivery of self assembled betulinic acid nano fibers: a biocompatible anti-leukemic therapy
Source: Royal Society of Chemistry journal article supplement (doi:10.1039/c5ra01076d), 2015-01-01
Supplement: c5ra01076d1.pdf [file c5ra01076d1.pdf]

## Supporting information

### **Folate decorated delivery of self assembled betulinic acid nano fibers: A biocompatible anti-leukemic therapy**

Sandeep Kumar Dash<sup>a#</sup>, Shib Shankar Dash<sup>b#</sup>, Sourav Chattopadhyay<sup>a</sup>, Totan Ghosh<sup>c</sup>, Satyajit Tripathy<sup>a</sup>, Santanu Kar Mahapatra<sup>d</sup>, Braja Gopal Bag<sup>b</sup>, Debasis Das<sup>c</sup>, Somenath Roy<sup>a\*</sup>

<sup>a</sup>Immunology and Microbiology Laboratory, Department of Human Physiology with Community Health, Vidyasagar University, Midnapore-721 102, West Bengal, India.

<sup>b</sup> Department of Chemistry and Chemical Technology, Vidyasagar University, Midnapore, 721 102, West Bengal, India

<sup>c</sup>Department of Chemistry, University of Calcutta, 92, A. P. C. Road, Kolkata - 700 009, India

<sup>d</sup>School of Chemical & Biotechnology, SASTRA University, Thanjavur – 613 401, Tamil Nadu, India.

**Running title: Cancer targeted delivery of self assembled betulinic acid through folate receptor**

#### **\*Address of Correspondence**

Immunology and Microbiology Laboratory  
Department of Human Physiology with Community Health  
Vidyasagar University  
Midnapore-721 102, West Bengal, India.

***E-mail:*** [sroy.vu@hotmail.com](mailto:sroy.vu@hotmail.com)

**# The authors are equally contributed to this work**

| SL. No | Composition  | Dry weight of conjugates (mg) | Encapsulation efficiency (EF %) | Loading capacity (LC %) |
|--------|--------------|-------------------------------|---------------------------------|-------------------------|
| 1.     | PEG+SA-BA    | 10+2                          | 86.47±1.068                     | 74.31±1.629             |
| 2.     | FA+PEG-SA-BA | 1.5+5                         | 61.77±2.058                     | 59.438±2.047            |
| 3.     | FA+PEG-SA-BA | 2.5+5                         | 96.22±1.73                      | 83.661±2.840            |

**Table S1:** Encapsulation efficiency (EE) and loading capacity (LC) of PEG with SA-BA and FA with PEG-SA-BA.

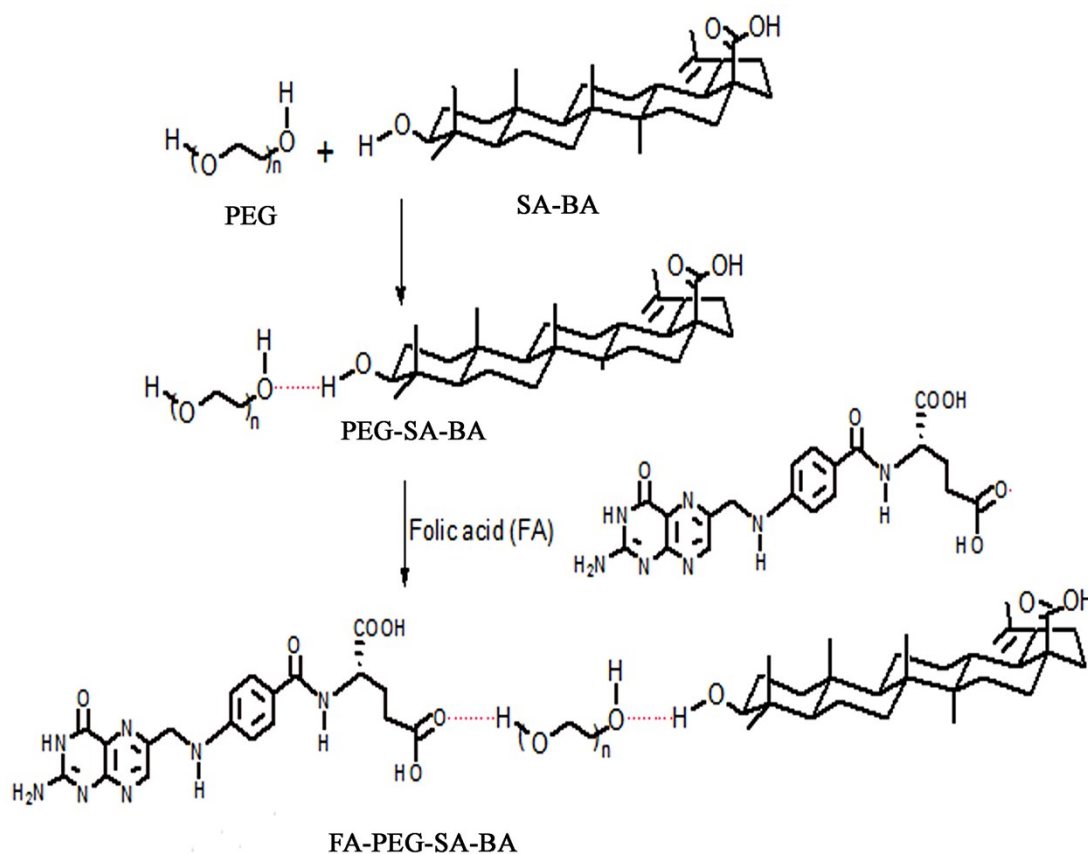

**Scheme S1:** Schematic representation of synthesis of BA-PEG and FA-PEG-SA-BA conjugates.

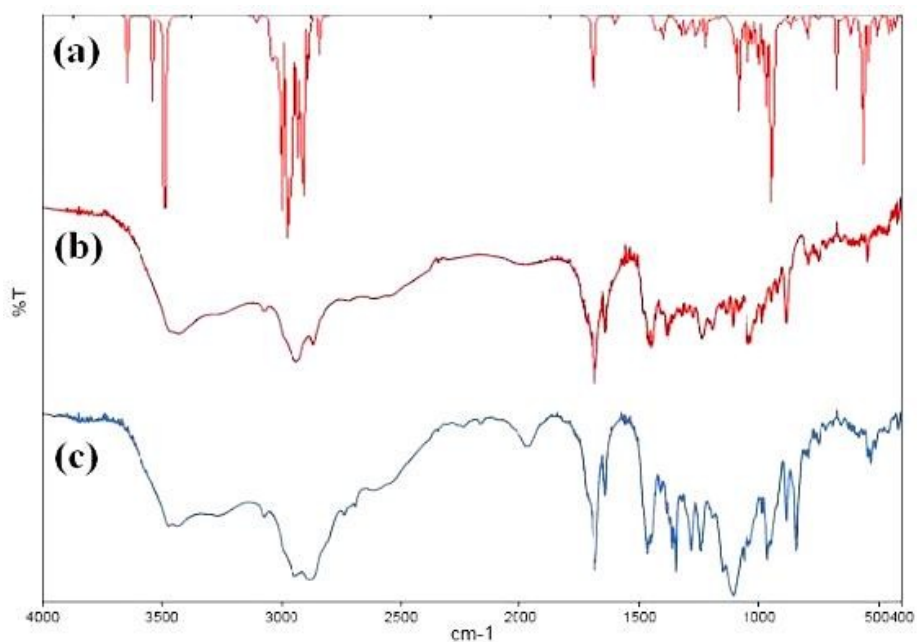

**Figure S1:** FTIR spectrum: (a) Theoretical IR of the mixture of SA-BA and PEG (PEG-SA-BA), (b) only SA-BA, and (c) experimental FTIR of the mixture of SA-BA and PEG (PEG-SA-BA).

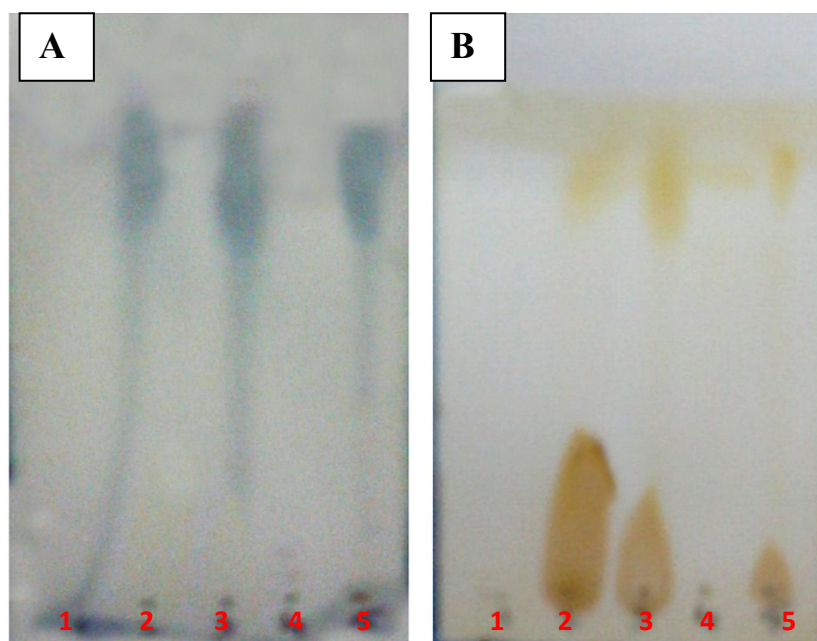

**Figure S2:** Thin layer chromatography identification of successful synthesized FA-PEG-SA-BA. **A:** The chromatographic paper stained with PMA solution and **B:** The chromatographic paper stained with Iodine vapor. Here, 1= SA-BA; 2=PEG; 3=PEG-SA-BA; 4=FA; 5=FA-PEG-SA-BA

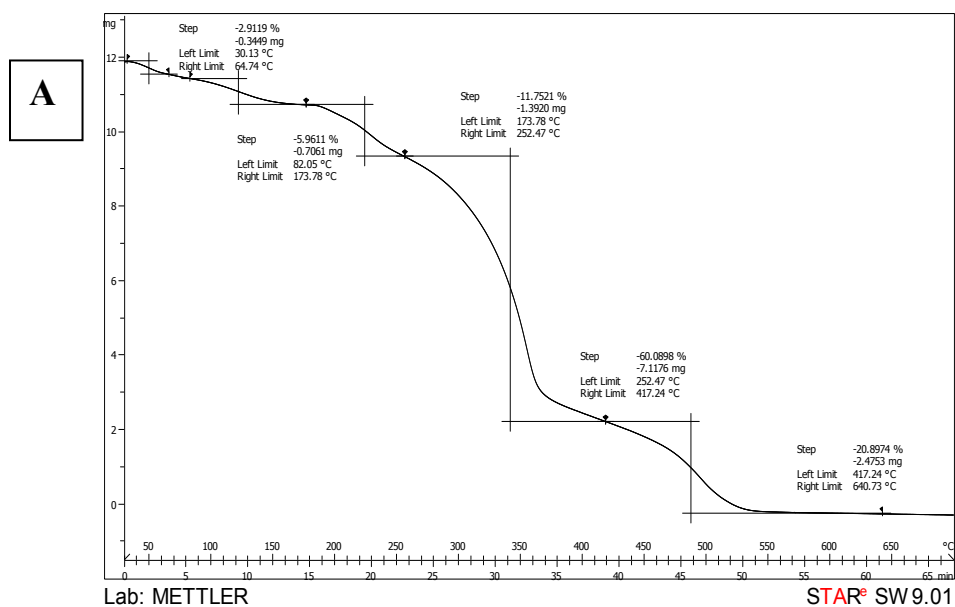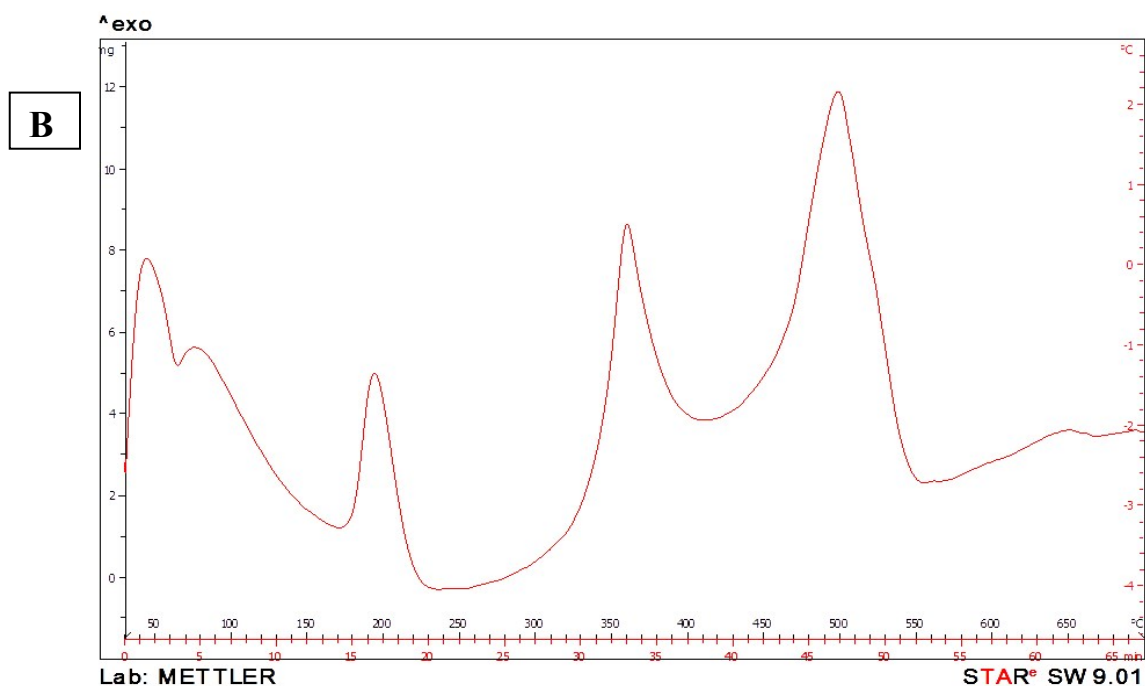

**Figure S3:** Thermogravimetry analysis of FA-PEG-SA-BA composite. Here: **(A)**: Graphical representation of TGA data of FA-PEG-SA-BA and **(B)**: Graphical representation of SDTA data of FA-PEG-SA-BA.

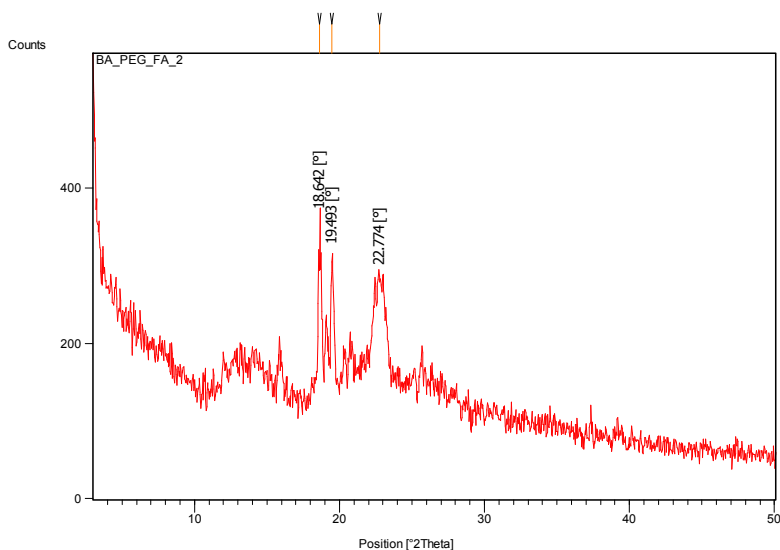

**Figure S4:** X-Ray diffraction analysis of FA-PEG-SA-BA.

**PEG-SA-BA:**  $^1\text{H-NMR}$  (300 MHz,  $\text{CDCl}_3$ )  $\delta$ : 3.65 (O-CH<sub>2</sub>, s), 4.66 (1H, s), 4.53 (1H, s), 1.68 (6H, s), 0.96(3H, s), 0.93 (3H, s), 0.82 (3H, s), 0.75 (3H, s).

The appearance of peaks for polyethylene glycol and betulinic acid indicated the formation of PEG-SA-BA conjugate.

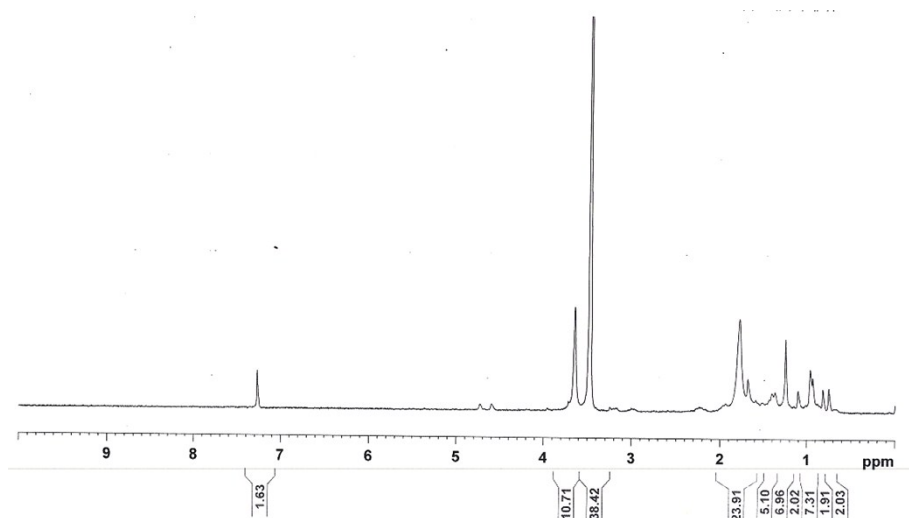

**Figure S5:**  $^1\text{H NMR}$  of PEG conjugated SA-BA (PEG-SA-BA)

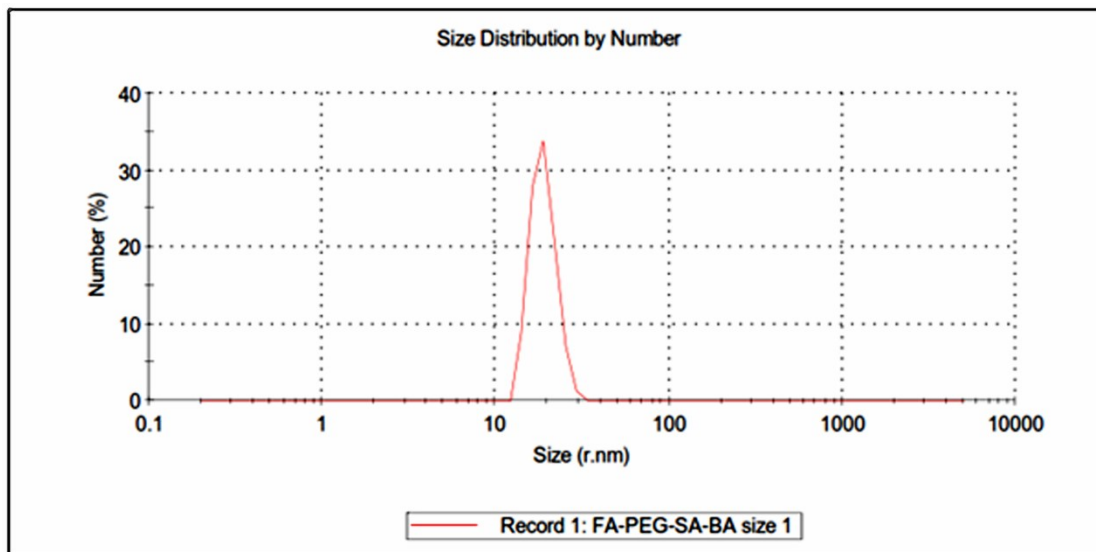

**Figure S6:** DLS of FA-PEG-SA-BA conjugates in aqueous medium.

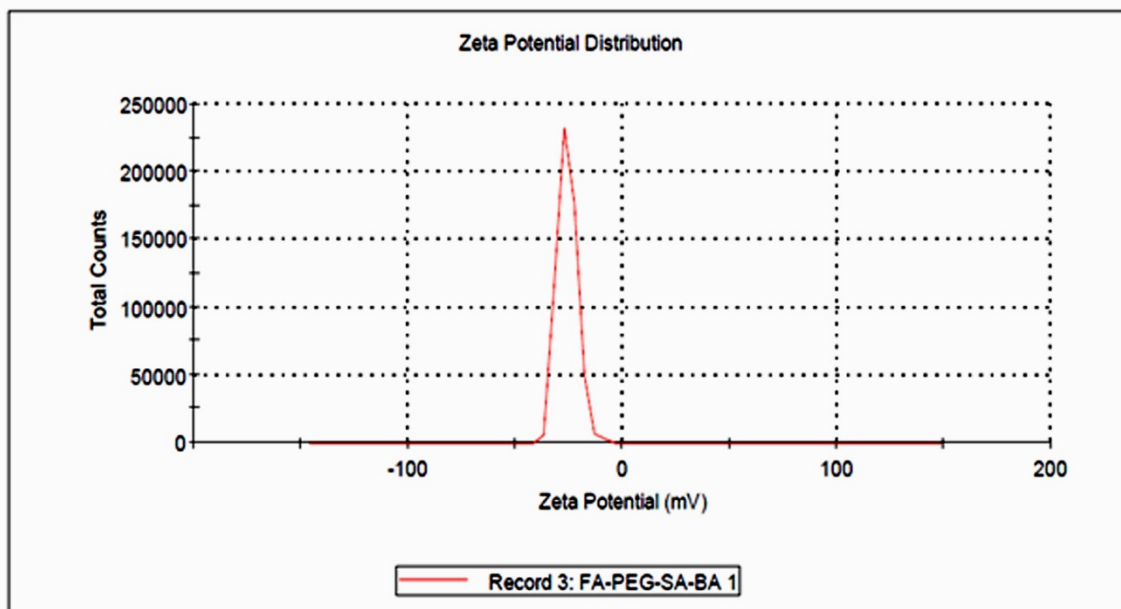

**Figure S7:** Zeta potential of FA-PEG-SA-BA conjugates in aqueous medium.

**Betulinic Acid (BA):**  $^1\text{H-NMR}$  (300 MHz,  $\text{DMSO-d}_6$ )  $\delta$ : 4.66 (1H, s), 4.53 (1H, s), 2.97-2.95 (2H, m), 2.26-0.90 (m, terpenoids protons, 20H), 1.62 (6H, s), 0.91(3H, s), 0.85 (3H, s), 0.75 (3H, s), 0.65 (3H, s).

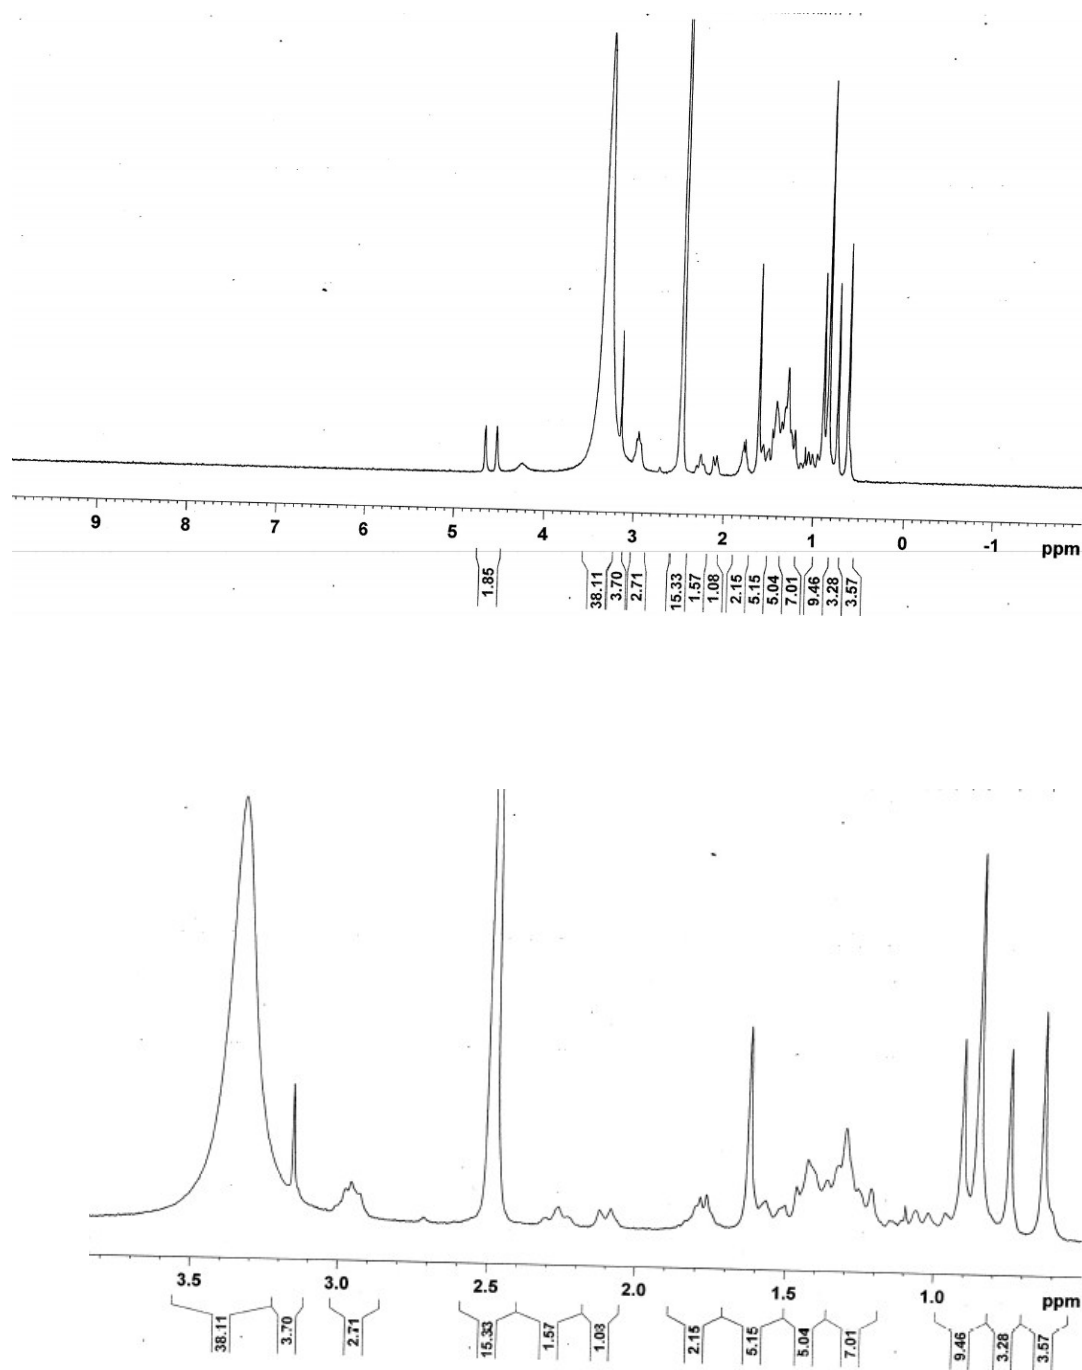

**Figure S8:**  $^1\text{H-NMR}$  of Betulinic acid.

**Polyethylene glycol (PEG):**  $^1\text{H-NMR}$  (300 MHz,  $\text{CDCl}_3$ )  $\delta$ : 3.62 (O- $\text{CH}_2$ , s), 2.66 (2H, s).

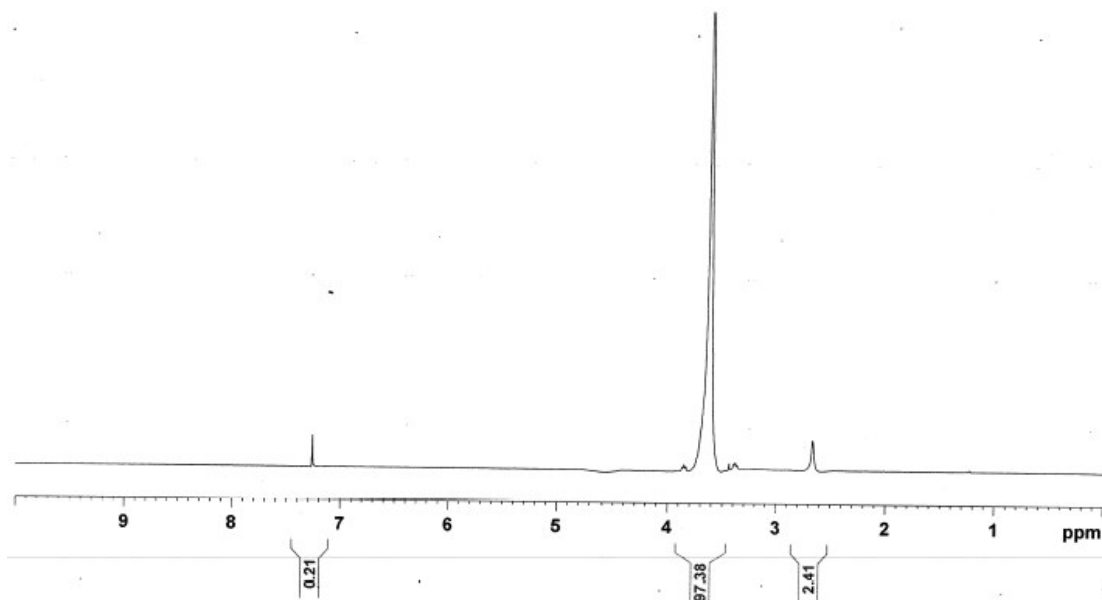

**Figure S9:**  $^1\text{H NMR}$  of PEG.

**Folic Acid (FA):**  $^1\text{H-NMR}$  (300 MHz,  $\text{DMSO-d}_6$ )  $\delta$ : 8.63 (1H, s), 8.27 (1H, s), 7.64-7.61(2H, d), 6.63-6.60 (1H, d), 6.30-6.28 (1H, d), 4.48-4.42 (2H, m), 4.17 (1H, m), 2.29-2.66 (2H, m), 1.22 (2H, s).

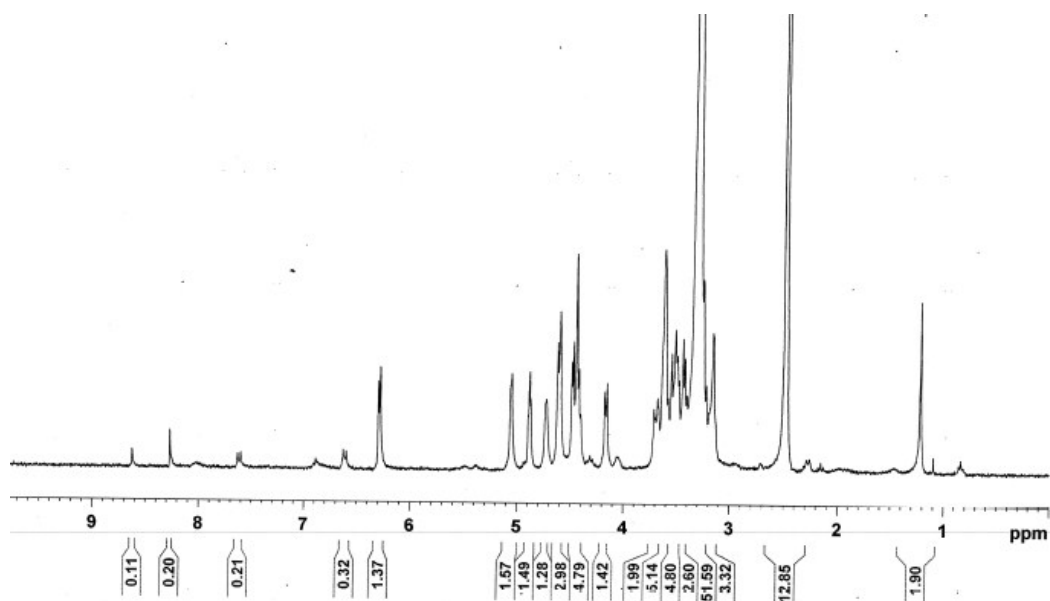



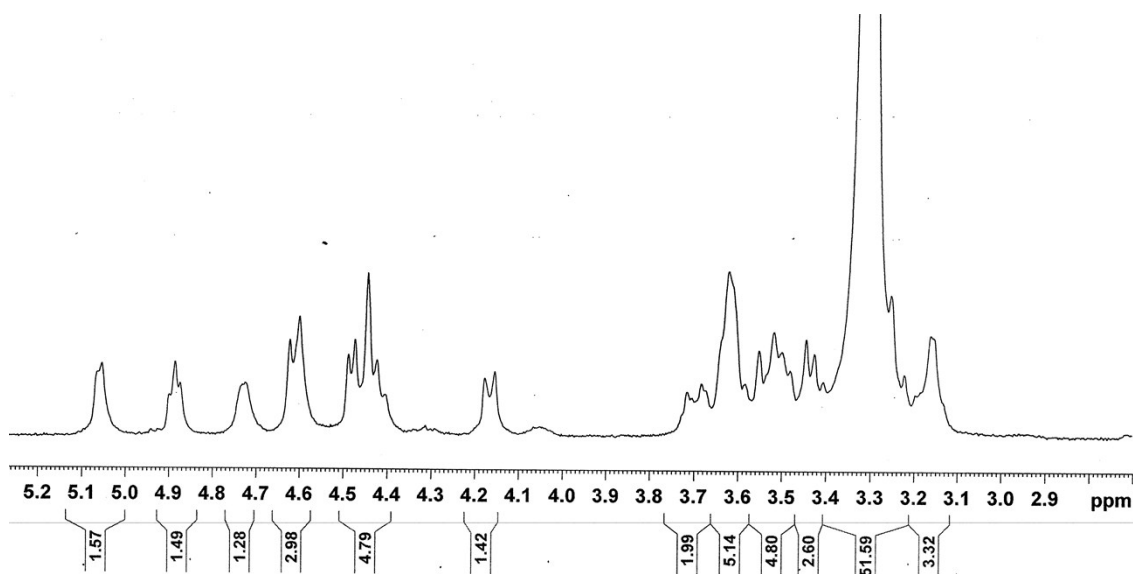

**Figure S10:**  $^1\text{H}$  NMR of FA.

**FA-PEG-SA-BA:**  $^1\text{H}$ -NMR (300 MHz,  $\text{DMSO-d}_6$ )  $\delta$ : 6.32-6.31(1H, d), 4.66 (1H, s), 4.63 (1H, s), 4.54-4.44 (2H, m), 4.17-4.15 (1H, m), 3.61 (O- $\text{CH}_2$ , s), 1.63 (3H, s), 0.96 (3H, s), 0.91(3H, s), 0.85 (3H, s), 0.74 (3H, s), 0.63 (3H, s), 2.02-0.96 (m, terpenoids protons, 20H).

In the  $^1\text{H}$ -NMR spectrum of FA-PEG-SA-BA, the appearance of characteristic peaks for folic acid, polyethylene glycol and betulinic acid clearly indicated the formation of FA-PEG-SA-BA conjugate.

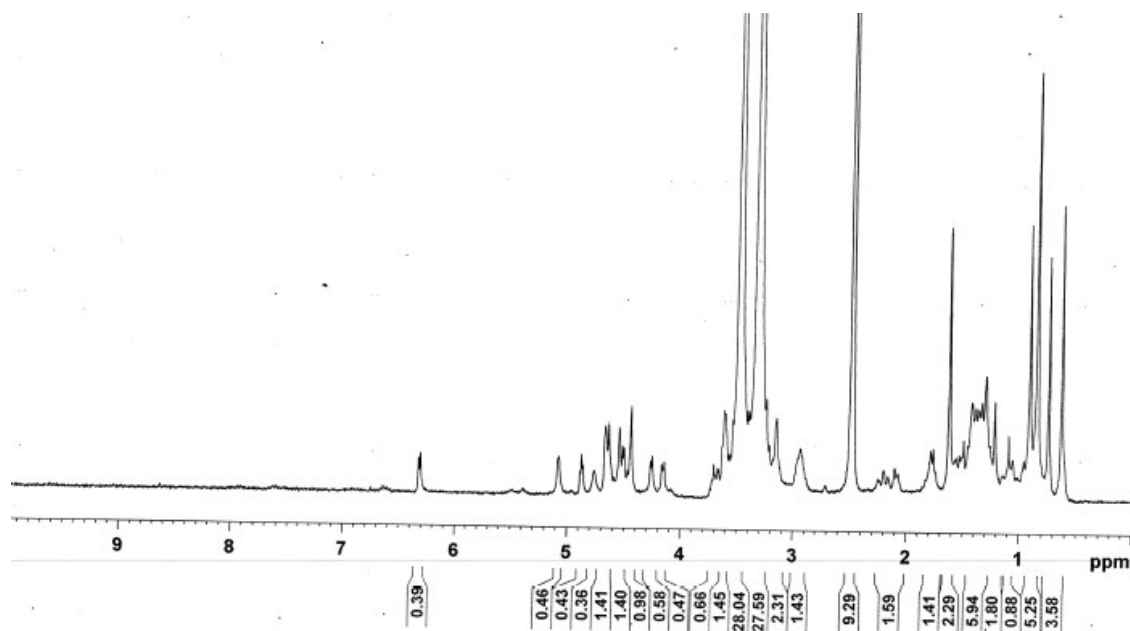

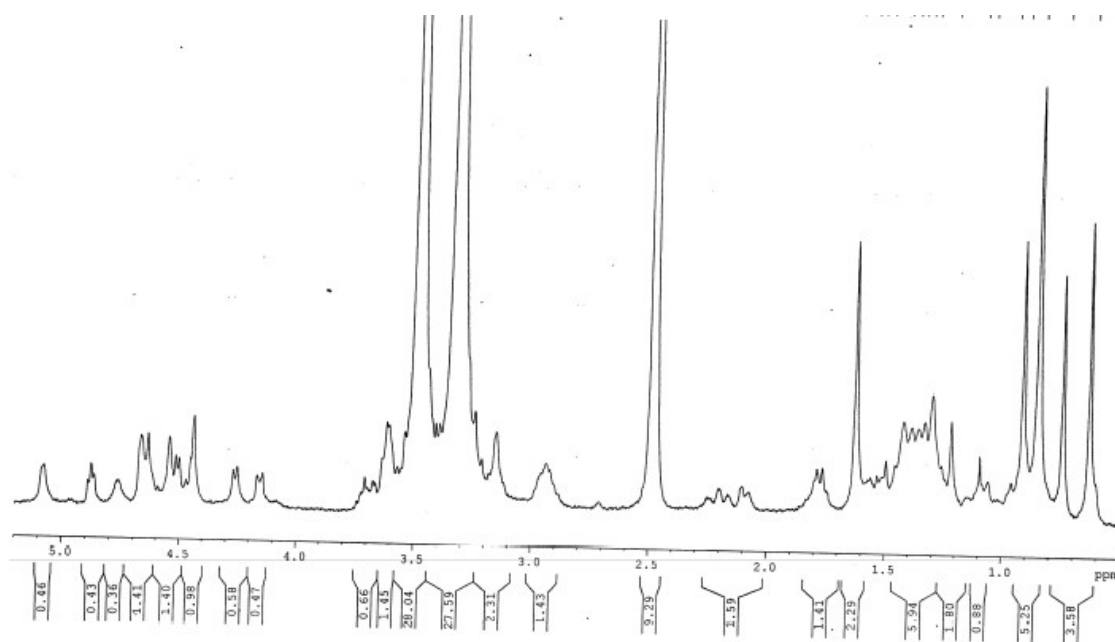

**Figure S11:**  $^1\text{H}$  NMR of FA-PEG-SA-BA conjugate.
